# Supplementary material
Source: PubMed Central journal article supplement (PMC3922039)
Supplement: bi401193w_si_001.pdf [file bi401193w_si_001.pdf]

**Supplementary Figure S1.** Sequences of the integration sites of (a,b) Mboumar-9 (Mbo9) transposition and (c,d) Mos1 transposition.

- a** Mbo9 with Mg<sup>2+</sup>
1. atttagaaaaataaacaataAggggttcgcgcacatttc
  2. gtggagctccaattcgcccTAtagtgagtcgtattacaat
  3. gagtaagtagttccagcTAatagtttgcgcaacgttgt
  4. accgcggtggcggccgctcTAgaactagtgatcccccg
  5. gaccaagtctactcatataTActtagattgattaaaac
  6. atgaagtttaaatcaatcTAaagtatatatgagtaaac
  7. tgcagcccggggatccacTAgttctagagcggccgcaact
  8. gtaaaaaatgagctgattTAcaaaaaatttaacgcggaat
  9. ctcaaatccacaacaTAcgagccggaagcataaaagt
  10. tcgaggtgcccgaagacacTAaatcggaaccctaaaggga
  11. actacgtgaaccatccccTAatcaagttttggggctg
  12. ggagctccaattcgccctaTAgtgagtcgtattacaattc
  13. tgagtgcactaacacatTAattgcgttcgctcactgc
  14. ccctattgttttttTAaatacattcaaatatgtat
  15. tgtctcatgagcggatacTAttgaaatgtattgaaaa
  16. cagctcatttttaaccaaTAggcccgaatcggcaaaatc
- b** Mbo9 with Mn<sup>2+</sup>
1. cagaccaagtctactcataTAtactttgattgattaaa
  2. catgagacaataaccctgaTAaatgctcaataatattga
  3. tgcctgactccccgctgtGAgataactacgatacgggag
  4. gtggagctccaattcgcccTAtagtgagtcgtattacaat
  5. taaatcaatctaaagtataTAgtaaaactggctgac
  6. aggtggcactttcggggaAAgtgagcggacccttatt
  7. atttcacaggaacacgcTAtgacctgattacgccaag
  8. agggttccgattagtgctTAcggcacctcgacccca
  9. gtgtaaagcctggggtgccTAatgagtgagcctaactcaca
  10. atgctccggctcgtatgtGTgtggaattgtgagcggat
  11. ttcgccctatagtgagtcgTAttcaattcactggccgtc
  12. agattgattaaaactcATTttaatttaaaaggatcta
  13. tagaaaagatcaaaggatcTcttgagatcctttttct
  14. tcgtgccagctgcattaatGAatcggccaacgcgaggga
  15. taccaggcagatggccacTAcgtgaaccatcaccta
- c** Mos1 with Mg<sup>2+</sup>
1. tgttgtcaaaaaagcggTAgctcctcggctcctccgat
  2. attagggtgatggttcacgTAgtgggccatcgccctgata
  3. tagactggatggaggcggTAaagttgcaggaccactct
  4. tcaataattattgaagcattTAcaggggtattgtctcatg
  5. cattaggcacccaggctTAcactttatgctccggcac
  6. atttagaaaaataaacaataAggggttcgcgcacatttc
  7. gccgcgctaatgcgcccTAcagggcgcgcccattcgc
  8. gggttccgatttagtgctTAcggcacctcgacccca
  9. gtggaacgaaaactcacgTAaggattttgtcatgaga
  10. gtcagaccaagttactcaTAtatacttagattgatta
  11. tttctaaatacattcaaaTAtgtatccgctcatgagaca
  12. ggagctccaattcgccctaTAgtgagtcgtattacaattc
  13. ctaaaggagccccgattTAgagcttgacggggaagcc
  14. aacatacgagccggaagcaTAaagtgaagcctggggtg
- d** Mos with Mn<sup>2+</sup>
1. ttattgtctatgagcggTAcatattgaaatgtattag
  2. gaaagccggcgaacgtggcGAgaaaggagggaagaaagc
  3. aaatcggcaaaatcccttaTAaatcaaaagaatagaccga
  4. aggtggcactttcggggaAAgtgagcggacccttatt
  5. gataaccgtattaccgcciTTgagtgagctgataccgctc
  6. tggacaagagtcactatTAaagaacgtggactccaacg
  7. tcaaatatgtatccgctcaTGagacaataaccctgataaa
  8. cgaggtcgcggtatcgaTAAgctgatatcgaattcctg
  9. tggagtccaagcttcttaaTAgtgactctgttccaaac
  10. aacatacgagccggaagcaTAaagtgaagcctggggtg
  11. gcctaagtgtgagcctaacTCacattaattgcgttcgct
  12. gacggccagtgaattgtaaTAcgactcactatagggcga
  13. gcatctcaggtggcatgACagtaagagaattatgcagt
  14. gcggttggcggattcattAAgtcagctggcagcagcaggt
  15. tcaatcctaaagtatatatgAGTaaactggctgacagtt
  16. gctccaattcgccctatagTGagtcgtattacaattcact
